# Supplementary material for: Circular RNAs are long-lived and display only minimal early alterations in response to a growth factor
Source: PubMed Central journal article supplement — Nucleic Acids Res. 2015 Dec 10;44(3):1370–83. doi: 10.1093/nar/gkv1367 (PMC4756822; doi:10.1093/nar/gkv1367), 2015-12-10
Supplement: supp_gkv1367_nar-02051-a-2015-File007.pdf [file supp_gkv1367_nar-02051-a-2015-File007.pdf]

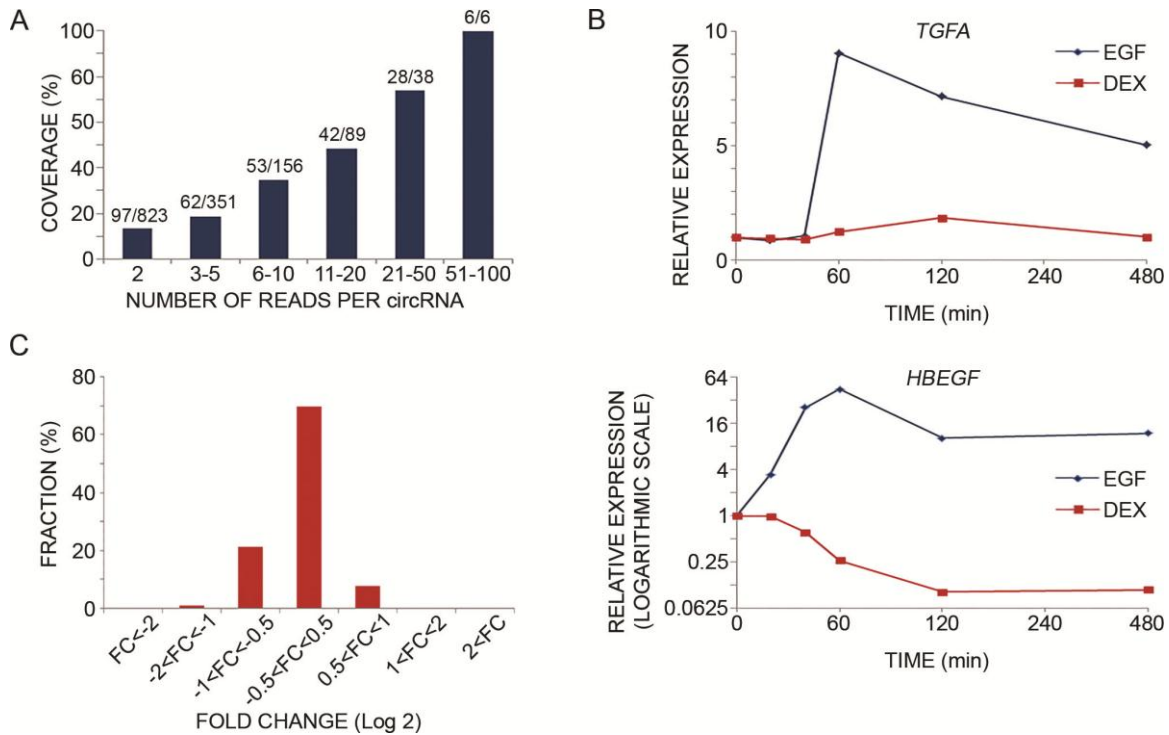

**Figure S1. RNA-sequencing and time-dependent EGF-inducible expression profiles of *TGFA* and *HBEGF*.** (A) A histogram presenting the distribution of RNA-Seq read numbers of circRNAs and the fraction of circRNAs measured by Fluidigm for each bin. The numbers above the bars represent the following: (number of circRNAs measured by Fluidigm) divided by (total number of candidate circRNAs). (B) MCF10A cells were treated with EGF (10 ng/ml) or DEX (100 nM) for the indicated time intervals, as described in the legend to Figure 1. High throughput PCR (Fluidigm) was used to determine abundance of mRNAs corresponding to *TGFA* and *HBEGF* (see Methods). (C) A histogram showing the range of abundance changes of circRNAs (N=89) displayed by EGF-stimulated MCF10A cells. To construct the histogram, the maximal change value (induction or repression) of 8h or 26h of stimulation was found for each RNA molecule.

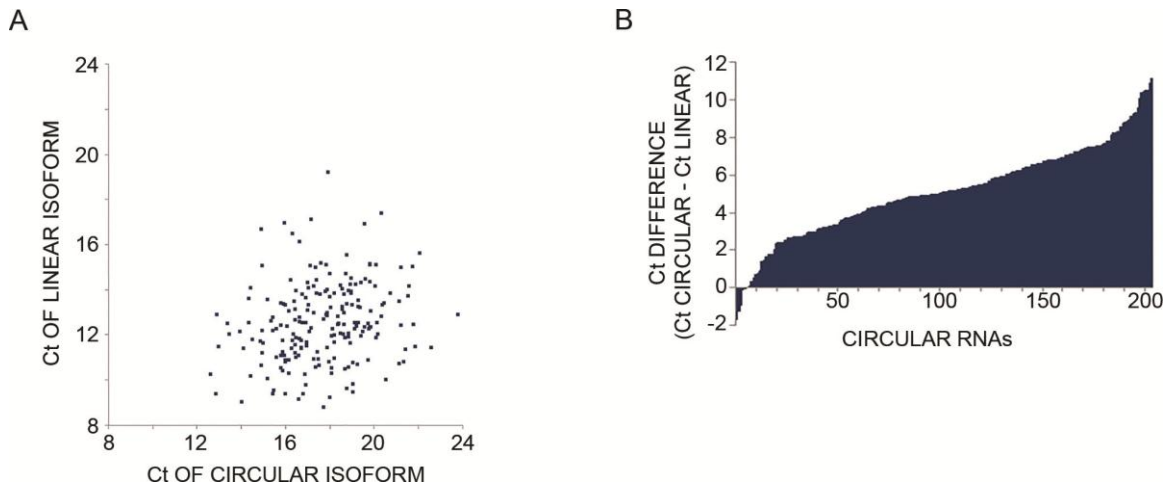

**Figure S2. Relations between Ct values of circRNAs and their linear counterparts.** (A) Ct values, as determined by Fluidigm, of linear RNA (N = 203) isoforms are presented against Ct values of the corresponding circular isoforms expressed in un-stimulated MCF10A human mammary cells. Pearson correlation coefficient = 0.22. (B) A histogram showing difference between Ct values of circRNAs and their corresponding linear isoforms ('Ct of circRNA' minus 'Ct of linear RNA') for 203 circRNAs expressed in MCF10A cells. Note that the vast majority of values (198 out of 203) are positive, meaning that the respective circRNAs have Ct values higher than their corresponding linear isoforms. Hence, most (>97%) circRNAs are less abundant than their corresponding linear isoforms.

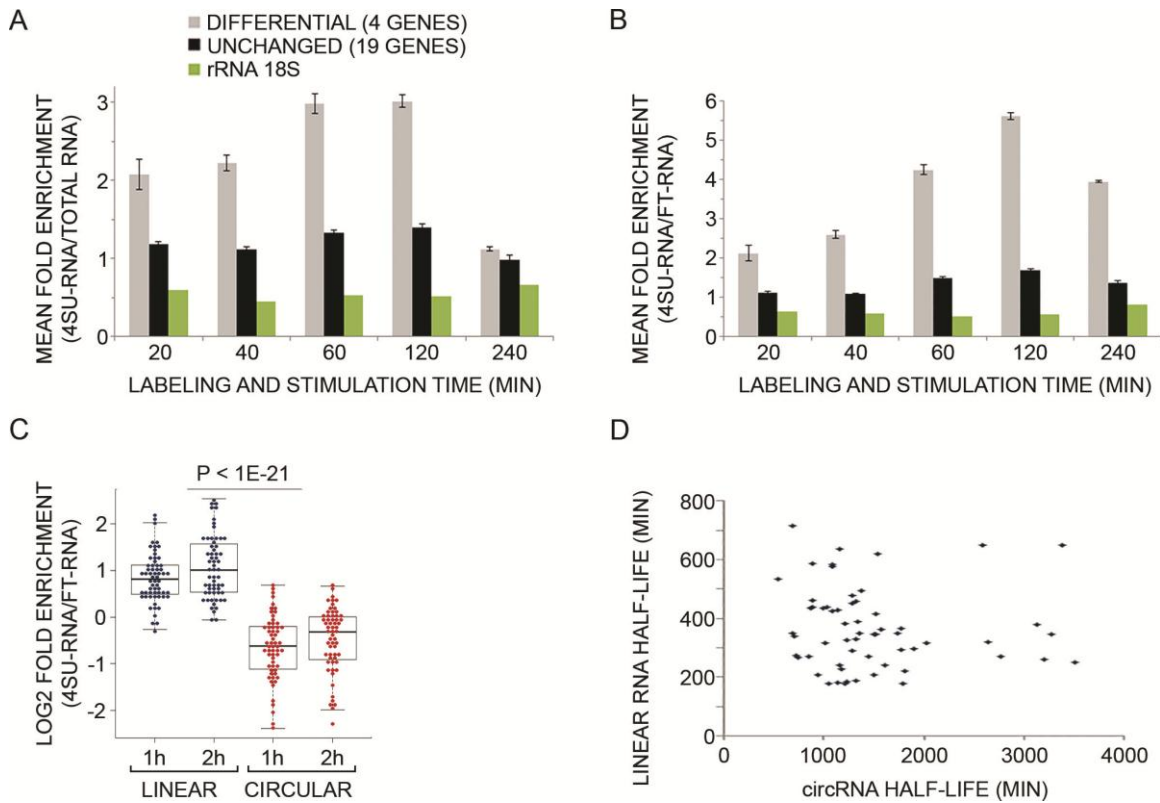

**Figure S3. Newly transcribed RNA is enriched for short-lived linear RNA isoforms and displays low abundance of the respective long-lived circular isoforms.** (A and B) MCF10A cells were treated with EGF for the indicated time intervals (20, 40, 60, 120 and 240 min) and simultaneously labeled with 4sU. Shown are the mean fold enrichments in 4sU labeled vs. total RNA (Y axis) (A) or flow-through RNA (B), based on Fluidigm quantification. Grey: 4 genes (*EGFR1*, *TGF $\alpha$* , *HBEGF* and *TXNIP*) whose expression changes in response to EGF (either induced or repressed). Black: 19 control genes whose expression does not change during the response to EGF; Green: long-lived rRNA 18S control. Error bars represent the standard error. The legend of panel A, including color codes, is shared with panel B. (C) MCF10A cells were treated with EGF for the indicated time intervals (1 and 2 h) and simultaneously labeled with 4sU. The boxplot diagram presents log<sub>2</sub> fold enrichments for 4sU-labeled RNA relative to pre-existing (flow-through) RNA (Y axis) ( $P < 1e-21$ , T-test, two-tailed distribution, unequal variance, Bonferroni corrected for multiple comparisons,  $N=61$ ). (D) A scatter plot displaying half-lives of linear RNAs against half-lives of the corresponding circRNAs as determined by analysis of nascent RNA. Half-lives were calculated from the ratios between nascent (RNA-4sU) and pre-existing RNAs (RNA-FT). The calculations were performed using the HALO software (Friedel et al., 2010) on RNA isolated from un-stimulated MCF10A cells labeled for 60 min with 4sU. All data were corrected for any bias due to relatively shorter RNA length. Pearson correlation coefficient = -0.06.

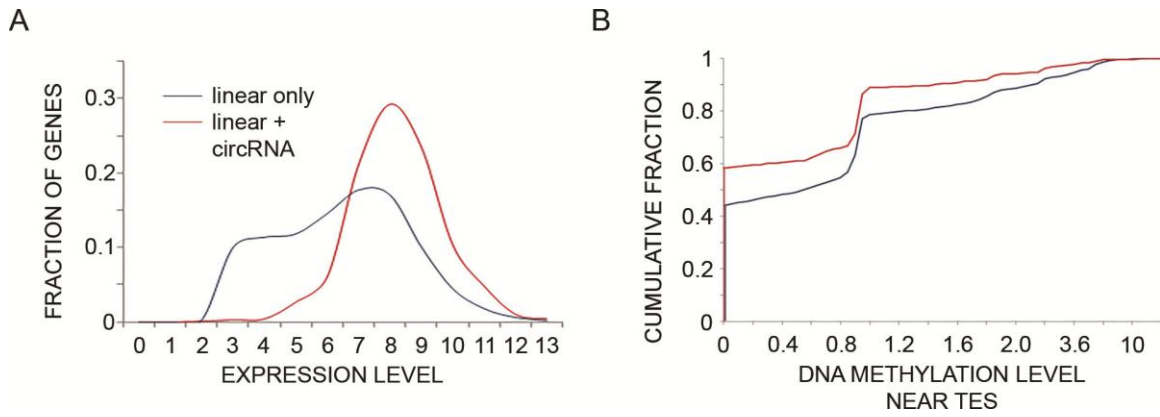

**Figure S4. Genes giving rise to circRNAs also generate the respective linear RNAs and they display less DNA methylation near TES compared to genes transcribed into linear RNA only.** (A) Basal (un-stimulated) expression levels of linear RNAs transcribed from genes that also give rise to circRNAs (red line;  $N = 975$ ) are compared to expression levels of linear RNAs transcribed from genes that give rise only to linear RNAs (blue line;  $N = 16,151$ ). Data was taken from our previously described exon microarray analyses (reference 41;  $P = 1e-201$ , T-test, two-tailed distribution, unequal variance). (B) Cumulative distribution of basal DNA methylation levels at the transcription end site ( $TES \pm 1,000$  bp) of genes transcribed into both circular and linear RNA ( $N = 898$ ) is compared to the cumulative distribution of methylation displayed by genes that give rise to linear RNA only (no detectable circRNAs;  $N = 5,916$ ). Note that DNA methylation levels are lower in genes producing circRNAs compared to the control group of genes ( $P = 4.79e-15$ , Mann-Whitney-U test).

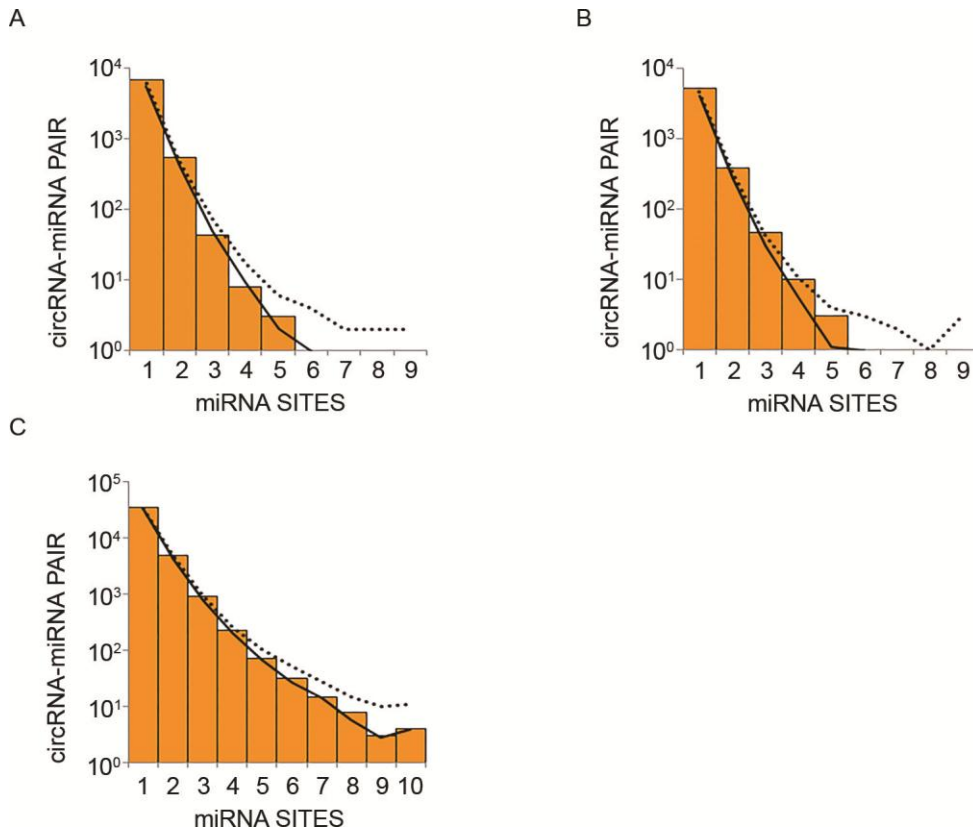

**Figure S5. CircRNAs show no enrichment for potential microRNA binding sites.** (A and B) Numbers of 7- and 8- nucleotide long sites for individual miRNA families found within each circRNA. The number of sites was tallied for each circRNA-miRNA pair, and the distribution of values is plotted. The miRNAs seeds were taken from 87 miRNA families conserved across all vertebrates (A) and 66 miRNA families conserved only among mammals (B). The solid black and dotted black curves indicate the averaged and 95% upper percentile, respectively, of results when repeating the analysis 1,000 times using different permutations of the sequences corresponding to the miRNA site. (C) Numbers of 6 nucleotide long sites (taken from window of nucleotides 7-12) of each miRNA found within each circRNA. The number of sites was tallied for each circRNA-miRNA pair, and the distribution of values is plotted. The solid black and dotted black curves indicate the averaged and 95% upper percentile, respectively, of results when repeating the analysis 1,000 times using different permutations of the sequences corresponding to the miRNA site.

**Table S1. Circular RNAs expressed in MCF10A human mammary cells.**

|                                            | <b>1<sup>st</sup> Round</b> | <b>2<sup>nd</sup> Round</b> | <b>3<sup>rd</sup> Round</b> |
|--------------------------------------------|-----------------------------|-----------------------------|-----------------------------|
| <b>Total number of reads</b>               | 71.19×10 <sup>6</sup>       | 182.80×10 <sup>6</sup>      | 148.46×10 <sup>6</sup>      |
| <b>Total number of non-ribosomal reads</b> | 12.17×10 <sup>6</sup>       | 17.78×10 <sup>6</sup>       | 47.73×10 <sup>6</sup>       |
| <b>Total circRNA reads</b>                 | 1,008                       | 1,807                       | 5,109                       |
| <b>Number of circRNAs</b>                  | 303                         | 369                         | 1,191                       |
| <b>Reads per circRNA</b>                   | 3.32                        | 4.89                        | 4.28                        |

RNA (20µg) was extracted from MCF10A cells that were either unstimulated or pre-treated for an hour with either EGF (10 ng/ml) or dexamethasone (DEX; 100 nM). A cDNA library was generated from ribosomal RNA-depleted RNA according to Illumina's RNA-seq protocol. The cDNA library was sequenced on Illumina Hiseq 2500 using a 1 x 100 bp run (Memczak et al., 2013). Sequencing reads were then combined and used for identification of circRNAs expressed in MCF10A cells. Shown is a summary of results obtained in three independent deep-sequencing experiments.

**Table S2. Half-lives of circular RNAs and their linear counterparts expressed in MCF10A human mammary cells.**

| <b>Gene</b>                             | <b>circular half-life (min)</b> | <b>standard error</b> | <b>linear half-life (min)</b> | <b>standard error</b> |
|-----------------------------------------|---------------------------------|-----------------------|-------------------------------|-----------------------|
| <b>FCHO2-chr5:72370568-72373320</b>     | 2972.32                         | 336.88                | 240.52                        | 31.17                 |
| <b>PHIP-chr6:79752559-79770535</b>      | 2803.68                         | 185.32                | 192.34                        | 8.24                  |
| <b>TMEM165-chr4:56277780-56284152</b>   | 2750.00                         | 118.97                | 397.09                        | 35.86                 |
| <b>NCAPG-chr4:17816475-17816981</b>     | 2494.85                         | 173.62                | 392.38                        | 24.06                 |
| <b>C3-chr19:6702137-6702590</b>         | 2722.90                         | 250.10                | 707.27                        | 72.68                 |
| <b>COG2-chr1:230798886-230800333</b>    | 2183.73                         | 290.17                | 291.87                        | 30.10                 |
| <b>ECT2-chr3:172499952-172504364</b>    | 2208.96                         | 15.19                 | 347.30                        | 35.66                 |
| <b>PCNT-chr21:47768925-47769734</b>     | 2151.57                         | 292.01                | 579.83                        | 28.49                 |
| <b>SHOC2-chr10:112723882-112745523</b>  | 1569.17                         | 96.68                 | 188.25                        | 29.89                 |
| <b>AAGAB-chr15:67524151-67529158</b>    | 1661.11                         | 122.59                | 316.61                        | 24.16                 |
| <b>CDC73-chr1:193202122-193205486</b>   | 1587.44                         | 47.32                 | 286.74                        | 22.01                 |
| <b>CRKL-chr22:21288066-21288532</b>     | 1516.41                         | 27.51                 | 217.08                        | 21.71                 |
| <b>PLEKHM3-chr2:208841374-208842310</b> | 1407.81                         | 103.57                | 214.05                        | 18.13                 |
| <b>MED13L-chr12:116668337-116675510</b> | 1426.36                         | 102.77                | 261.20                        | 20.22                 |
| <b>N4BP2L2-chr13:33091993-33101669</b>  | 1506.34                         | 102.55                | 385.56                        | 13.98                 |
| <b>NARS2-chr11:78176921-78204241</b>    | 1501.38                         | 36.19                 | 405.79                        | 30.34                 |
| <b>DNAJC6-chr1:65830317-65831879</b>    | 1240.19                         | 3.43                  | 195.13                        | 28.83                 |
| <b>ELK4-chr1:205585605-205593019</b>    | 1173.44                         | 14.05                 | 198.15                        | 26.33                 |
| <b>NUP54-chr4:77055327-77065626</b>     | 1335.86                         | 81.76                 | 395.95                        | 24.75                 |

|                                         |         |        |        |       |
|-----------------------------------------|---------|--------|--------|-------|
| <b>RAB3IP-chr12:70193988-70195501</b>   | 1196.89 | 23.99  | 302.24 | 12.01 |
| <b>RNF111-chr15:59323002-59323901</b>   | 1039.46 | 16.97  | 167.33 | 22.98 |
| <b>ZKSCAN1-chr7:99621041-99621930</b>   | 1173.90 | 45.57  | 311.70 | 37.54 |
| <b>ZNF782-chr9:99579646-99589463</b>    | 1153.22 | 60.47  | 295.93 | 31.64 |
| <b>DUSP16-chr12:12672795-12674397</b>   | 996.71  | 0.63   | 162.28 | 17.50 |
| <b>RNF168-chr3:196210640-196215554</b>  | 980.46  | 70.68  | 175.72 | 20.29 |
| <b>KIF15-chr3:44826336-44835918</b>     | 1142.92 | 42.56  | 363.80 | 22.65 |
| <b>CLIP4-chr2:29356520-29368233</b>     | 1078.86 | 47.57  | 303.52 | 48.40 |
| <b>RAB11FIP1-chr8:37727937-37735069</b> | 977.47  | 43.99  | 207.18 | 17.99 |
| <b>HIPK2-chr7:139415730-139416814</b>   | 1109.63 | 5.96   | 349.33 | 38.77 |
| <b>NCOA3-chr20:46252654-46262380</b>    | 1032.24 | 26.35  | 298.28 | 45.20 |
| <b>CPSF6-chr12:69644908-69656342</b>    | 1136.70 | 11.30  | 413.73 | 53.19 |
| <b>CAPRIN1-chr11:34093272-34098189</b>  | 1066.47 | 60.64  | 355.97 | 66.09 |
| <b>SH3RF1-chr4:170076630-170077830</b>  | 878.67  | 43.70  | 179.37 | 25.82 |
| <b>CEP72-chr5:619104-620376</b>         | 1147.62 | 82.60  | 470.16 | 23.83 |
| <b>ZNF133-chr20:18278628-18287037</b>   | 943.16  | 44.49  | 268.02 | 34.32 |
| <b>FO XK2-chr17:80521229-80526077</b>   | 1120.94 | 8.76   | 450.94 | 57.68 |
| <b>SPC24-chr19:11258493-11258789</b>    | 1214.83 | 159.43 | 565.50 | 10.59 |
| <b>MAPK9-chr5:179688683-179707608</b>   | 1100.67 | 16.61  | 499.21 | 57.36 |
| <b>ERC1-chr12:1136913-1137738</b>       | 936.12  | 7.49   | 392.86 | 49.25 |
| <b>TCP11L1-chr11:33065295-33079685</b>  | 871.81  | 65.88  | 341.46 | 38.31 |
| <b>SPATS2L-chr2:201283972-201284219</b> | 1059.00 | 62.79  | 558.62 | 26.99 |
| <b>NPEPPS-chr17:45695715-45696530</b>   | 1039.69 | 9.66   | 540.45 | 59.72 |
| <b>LARP4B-chr10:909682-931700</b>       | 888.15  | 69.12  | 401.13 | 54.84 |
| <b>SOX13-chr1:204082042-204083733</b>   | 902.08  | 80.49  | 455.77 | 44.65 |
| <b>ITPKC-chr19:41242890-41243674</b>    | 679.79  | 78.62  | 234.69 | 17.38 |
| <b>ESYT2-chr7:158552176-158557544</b>   | 910.24  | 7.41   | 544.15 | 47.39 |
| <b>ANKH-chr5:14741935-14758707</b>      | 940.15  | 29.27  | 580.91 | 58.08 |
| <b>G3BP2-chr4:76573822-76581054</b>     | 620.63  | 10.63  | 291.15 | 23.00 |
| <b>ASAP2-chr2:9458652-9468040</b>       | 727.30  | 37.34  | 424.77 | 42.82 |
| <b>CARD6-chr5:40852275-40854198</b>     | 967.48  | 5.13   | 678.68 | 91.32 |
| <b>OSBPL10-chr3:31917924-31921322</b>   | 571.69  | 7.41   | 302.10 | 21.79 |
| <b>HAUS1-chr18:43702432-43703330</b>    | 648.77  | 64.30  | 381.79 | 0.27  |
| <b>USP48-chr1:22074630-22078108</b>     | 751.64  | 61.37  | 489.02 | 4.93  |
| <b>RNF214-chr11:117150623-117150975</b> | 747.48  | 79.18  | 492.17 | 47.50 |
| <b>ACADM-chr1:76211490-76216231</b>     | 590.96  | 18.22  | 378.99 | 27.43 |
| <b>CLEC16A-chr16:11114049-11154879</b>  | 763.30  | 68.07  | 574.77 | 49.44 |
| <b>CCT3-chr1:156303337-156304709</b>    | 643.79  | 30.48  | 503.68 | 34.06 |
| <b>PSMA7-chr20:60714130-60716000</b>    | 585.39  | 18.01  | 497.54 | 17.01 |
| <b>SPTAN1-chr9:131377910-131380387</b>  | 543.78  | 23.28  | 685.28 | 25.51 |
| <b>SDF4-chr1:1158623-1159348</b>        | 445.51  | 15.77  | 682.28 | 38.66 |

RNA was isolated from un-stimulated MCF10A cells pre-labeled with 4sU for 60 and 120 min. Half-lives of the indicated circular and linear isoforms were calculated from the ratios between nascent (RNA-4sU) and pre-existing RNAs (RNA-FT). The calculations were performed using the HALO software (ref. 39). Presented are the average and standard error of half-lives obtained from the 60 and 120 min labeling intervals. The genomic coordinates correspond to the non-canonical splice site that was used to detect the circRNA.
